# Supplementary material for: Resveratrol Targets Urokinase-Type Plasminogen Activator Receptor Expression to Overcome Cetuximab-Resistance in Oral Squamous Cell Carcinoma
Source: PubMed Central journal article supplement (PMC6704133; doi:10.1038/s41598-019-48717-w), 2019-08-21
Supplement: 41598_2019_48717_MOESM2_ESM.pdf [file 41598_2019_48717_MOESM2_ESM.pdf]

## Supplementary information for

### Resveratrol Targets Urokinase-Type Plasminogen Activator Receptor Expression to Overcome Cetuximab-Resistance in Oral Squamous Cell Carcinoma

Katsuhiko Uzawa<sup>1,2\*</sup>, Antonio L Amelio<sup>3,4,5\*</sup>, Atsushi Kasamatsu<sup>2</sup>, Tomoaki Saito<sup>2</sup>, Akihiro Kita<sup>2</sup>, Megumi Fukamachi<sup>1</sup>, Yuki Sawai<sup>1</sup>, Yuriko Toeda<sup>1</sup>, Keitaro Eizuka<sup>1</sup>, Fumihiko Hayashi<sup>1</sup>, Ikuko Kase-Kato<sup>1</sup>, Masataka Sunohara<sup>6</sup>, Manabu Iyoda<sup>2</sup>, Kazuyuki Koike<sup>2</sup>, Dai Nakashima<sup>2</sup>, Katsunori Ogawara<sup>1</sup>, Yosuke Sakamoto-Endo<sup>2</sup>, Masashi Shiiba<sup>7</sup>, Yuichi Takiguchi<sup>7</sup>, Mitsuo Yamauchi<sup>3</sup> and Hideki Tanzawa<sup>1,2</sup>

<sup>1</sup> Department of Oral Science, Graduate School of Medicine, Chiba University, 1-8-1 Inohana, Chuo-ku, Chiba 260-8670, Japan

<sup>2</sup> Department of Dentistry and Oral-Maxillofacial Surgery, Chiba University Hospital, 1-8-1 Inohana, Chuo-ku, Chiba 260-8677, Japan

<sup>3</sup> Division of Oral and Craniofacial Health Sciences, University of North Carolina at Chapel Hill, Chapel Hill, NC 27599-7455, USA

<sup>4</sup> Lineberger Comprehensive Cancer Center, University of North Carolina at Chapel Hill, Chapel Hill, NC 27599-7455, USA

<sup>5</sup> Biomedical Research Imaging Center, University of North Carolina at Chapel Hill, Chapel Hill, NC 27599-7455, USA

<sup>6</sup> Department of Anatomy, School of Life Dentistry at Tokyo, Nippon Dental University, 1-9-20 Fujimi, Chiyoda-ku, Tokyo 102-8159, Japan

<sup>7</sup> Department of Medical Oncology, Graduate School of Medicine, Chiba University, 1-8-1 Inohana, Chuo-ku, Chiba 260-8670, Japan

#### \*Corresponding Authors:

Katsuhiko Uzawa, DDS, PhD, FIBCSOMS

*Editorial Board Member of Scientific Reports (Cancer Category)*

Department of Oral Science

Graduate School of Medicine, Chiba University

1-8-1 Inohana, Chuo-ku

Chiba, 260-8670, Japan

Phone: +81-43-226-2300

E-mail: uzawak@faculty.chiba-u.jp

Antonio L. Amelio, PhD

Division of Oral and Craniofacial Health Sciences

Lineberger Comprehensive Cancer Center

University of North Carolina at Chapel Hill

Chapel Hill, NC 27599-7455, USA

Phone: (919) 537-3309

E-mail: alamelio@email.unc.edu

**Supplementary Table S1. Candidate genes increased significantly in the cetuximab-resistant cells**

| Probe ID       | Symbol       | Name                                                            | parental cells |         |         | resistant |         |         |
|----------------|--------------|-----------------------------------------------------------------|----------------|---------|---------|-----------|---------|---------|
|                |              |                                                                 | SAS            | Sa3     | HSC-3   | SAS       | Sa3     | HSC-3   |
| A_23_P97700    | TXNIP        | thioredoxin interacting protein                                 | 1072.84        | 96.1433 | 122.343 | 39547.1   | 26784.9 | 43156.9 |
| A_21_P0014894  |              |                                                                 | 19.2041        | 5.05957 | 3.52397 | 383.592   | 506.954 | 562.833 |
| A_24_P178065   | PHLDB2       | pleckstrin homology like domain family B member 2               | 13.8285        | 20.1503 | 3.63305 | 111.05    | 906.309 | 526.248 |
| A_23_P338479   | CD274        | CD274 molecule                                                  | 26.1045        | 62.3417 | 7.77029 | 132.007   | 1381.61 | 1095.08 |
| A_33_P3346936  | MON2         | MON2 homolog, regulator of endosome-to-Golgi trafficking        | 20.075         | 10.5618 | 6.62888 | 181.78    | 192.217 | 571.45  |
| A_21_P0000073  | OSMR         | oncostatin M receptor                                           | 310.784        | 578.109 | 153.537 | 5515.16   | 7922.06 | 8043.04 |
| A_33_P3237567  | HLA-A        | major histocompatibility complex, class I, A                    | 91.2334        | 43.6988 | 78.5075 | 955.11    | 1570.65 | 2430.57 |
| A_33_P3343516  | LOC100129617 | uncharacterized LOC100129617                                    | 21.0469        | 21.1759 | 6.75365 | 214.068   | 1209.58 | 121.395 |
| A_33_P3408918  | SAA2         | serum amyloid A2                                                | 396.513        | 279.23  | 130.226 | 12841.1   | 1237.43 | 6225.57 |
| A_21_P0000152  | CD44         | CD44 molecule (Indian blood group)                              | 38.493         | 91.7745 | 29.5994 | 461.681   | 1615.37 | 959.117 |
| A_33_P3424462  | CNST         | consortin, connexin sorting protein                             | 19.4103        | 23.4129 | 6.99491 | 171.051   | 309.985 | 330.296 |
| A_33_P3390024  | EXOC7        | exocyst complex component 7                                     | 47.6448        | 53.0321 | 36.1884 | 323.572   | 1931.16 | 763.842 |
| A_21_P0009099  |              |                                                                 | 4.00594        | 7.24498 | 5.20862 | 77.1598   | 71.3591 | 142.201 |
| A_33_P3310286  |              |                                                                 | 7.96423        | 30.2674 | 3.56487 | 70.978    | 320.991 | 169.763 |
| A_33_P3299781  | DDRKG1       | DDRKG domain containing 1                                       | 246.762        | 141.185 | 138     | 2307.39   | 3994.99 | 2184.17 |
| A_33_P3230528  | MPRIP        | myosin phosphatase Rho interacting protein                      | 68.8041        | 216.534 | 62.2419 | 976.346   | 3601.35 | 1071.37 |
| A_24_P332647   | SSH1         | slingshot protein phosphatase 1                                 | 45.4705        | 84.7454 | 14.6712 | 333.445   | 854.304 | 800.009 |
| A_33_P3240158  |              |                                                                 | 8.30575        | 9.33147 | 9.88333 | 38.994    | 246.562 | 304.263 |
| A_21_P0010978  |              |                                                                 | 27.4653        | 16.4641 | 40.8952 | 163.055   | 527.278 | 717.989 |
| A_33_P3331080  | SEC24A       | SEC24 homolog A, COPII coat complex component                   | 32.5051        | 26.3027 | 15.9556 | 174.173   | 683.952 | 372.689 |
| A_33_P3263538  |              |                                                                 | 291.852        | 202.66  | 442.86  | 3114.85   | 3581.39 | 7429.44 |
| A_33_P3239569  | RPS21        | ribosomal protein S21                                           | 74.2662        | 98.0833 | 101.929 | 345.916   | 4623.62 | 1449.85 |
| A_33_P3346937  | MON2         | MON2 homolog, regulator of endosome-to-Golgi trafficking        | 34.3129        | 19.2828 | 6.82026 | 246.709   | 314.873 | 842.787 |
| A_33_P3379571  | MAP3K9       | mitogen-activated protein kinase kinase kinase 9                | 94.6864        | 101.449 | 44.9893 | 859.577   | 2736.64 | 485.738 |
| A_33_P3405500  | SACS         | sacsin molecular chaperone                                      | 40.5012        | 58.5556 | 22.3989 | 280.553   | 560.654 | 869.931 |
| A_33_P3240757  | IGSF3        | immunoglobulin superfamily member 3                             | 25.0734        | 10.8184 | 29.262  | 315.74    | 260.053 | 237.006 |
| A_23_P81898    | UBD          | ubiquitin D                                                     | 19.632         | 26.2398 | 3.48179 | 212.879   | 123.76  | 155.187 |
| A_21_P0000535  | LINC00173    | long intergenic non-protein coding RNA 173                      | 24.8036        | 5.54708 | 7.9904  | 72.6794   | 149.206 | 203.533 |
| A_33_P3242952  | FAM72A       | family with sequence similarity 72 member A                     | 138.951        | 369.307 | 37.9733 | 1131.17   | 1344.26 | 2544.24 |
| A_23_P62642    | CFAP45       | cilia and flagella associated protein 45                        | 23.6777        | 18.1338 | 3.39429 | 237.379   | 197.03  | 61.4274 |
| A_33_P3390713  |              |                                                                 | 25.3995        | 3.88746 | 7.05761 | 214.986   | 70.8255 | 87.159  |
| A_21_P0014428  | LOC101927372 | uncharacterized LOC101927372                                    | 211.603        | 37.9837 | 206.457 | 1600.82   | 1286.88 | 1399.83 |
| A_24_P230938   | MORN4        | MORN repeat containing 4                                        | 57.1549        | 78.5486 | 155.563 | 484.507   | 1454.4  | 1684.29 |
| A_23_P426305   | AOC3         | amine oxidase copper containing 3                               | 21.0543        | 9.4982  | 7.30544 | 102.7     | 159.966 | 141.441 |
| A_24_P34155    | RUNX1        | runt related transcription factor 1                             | 73.872         | 70.1697 | 33.5063 | 481.936   | 983.947 | 570.998 |
| A_24_P376129   | DFNB31       | deafness, autosomal recessive 31                                | 17.0335        | 7.08285 | 15.3769 | 124.219   | 208.067 | 109.729 |
| A_21_P0006372  | LOC101929014 | uncharacterized LOC101929014                                    | 54.6361        | 23.4643 | 18.1943 | 525.005   | 81.5855 | 745.272 |
| A_33_P3420862  | PAGE2B       | PAGE family member 2B                                           | 67.1685        | 7.50783 | 6.67832 | 196.46    | 153.025 | 144.11  |
| A_33_P3336925  | PDLIM5       | PDZ and LIM domain 5                                            | 212.494        | 309.649 | 131.111 | 1710.27   | 1639.86 | 3934.27 |
| A_23_P339818   | ARRDC4       | arrestin domain containing 4                                    | 103.384        | 31.3877 | 78.0175 | 862.509   | 317.649 | 1098.88 |
| A_21_P0000086  | GOLGA3       | golgin A3                                                       | 20.2615        | 10.3761 | 8.56644 | 103.103   | 52.1376 | 389.874 |
| A_23_P424561   | RHOV         | ras homolog family member V                                     | 79.1197        | 99.5614 | 82.9286 | 393.526   | 2369.68 | 747.345 |
| A_21_P0001979  |              |                                                                 | 4.56622        | 11.7135 | 9.09323 | 181.005   | 64.5801 | 44.3362 |
| A_33_P3280597  |              |                                                                 | 22.1495        | 23.2356 | 24.3925 | 257.716   | 195.917 | 260.008 |
| A_33_P3363720  | ZNF436-AS1   | ZNF436 antisense RNA 1                                          | 32.5272        | 45.7925 | 77.4278 | 181.929   | 701.561 | 904.649 |
| A_23_P53370    | RND1         | Rho family GTPase 1                                             | 15.0668        | 14.5192 | 15.4502 | 55.3304   | 268.216 | 235.184 |
| A_19_P00321743 | LOC100130938 | uncharacterized LOC100130938                                    | 171.85         | 42.7271 | 40.1433 | 546.954   | 1315.99 | 422.327 |
| A_23_P111132   | HSPA1A       | heat shock protein family A (Hsp70) member 1A                   | 4887.28        | 2699.81 | 3751.2  | 15756.3   | 70713.3 | 42808.7 |
| A_33_P3228642  |              |                                                                 | 37.0459        | 30.6396 | 20.4634 | 183.17    | 831.461 | 138.695 |
| A_19_P00805006 | MALAT1       | metastasis associated lung adenocarcinoma transcript 1          | 708.915        | 188.72  | 269.591 | 1615.99   | 3813    | 5186.61 |
| A_33_P3339361  | ARHGAP11A    | Rho GTPase activating protein 11A                               | 21.0774        | 21.6628 | 6.69812 | 76.4086   | 142.457 | 246.137 |
| A_23_P169017   | DEFB103B     | defensin beta 103B                                              | 27.694         | 22.3019 | 6.24857 | 211.91    | 50.131  | 315.151 |
| A_24_P226278   | JADE2        | jade family PHD finger 2                                        | 121.198        | 394.317 | 286.461 | 985.836   | 4069.28 | 2882.26 |
| A_32_P70927    | PAGE2        | PAGE family member 2                                            | 32.0754        | 4.06481 | 3.51969 | 82.4085   | 72.3944 | 60.6788 |
| A_24_P130936   | DDX3Y        | DEAD-box helicase 3 Y-linked                                    | 36.9722        | 25.3327 | 23.7872 | 359.785   | 193.258 | 250.39  |
| A_23_P144807   | 8-Sep        | septin 8                                                        | 7.90781        | 4.94759 | 4.39266 | 46.6296   | 49.3815 | 58.2356 |
| A_33_P3330236  |              |                                                                 | 27.575         | 27.8482 | 17.9417 | 244.665   | 443.08  | 98.9697 |
| A_23_P103110   | MAFF         | MAF bZIP transcription factor F                                 | 280.724        | 331.975 | 118.725 | 1017.3    | 4868.66 | 1701.98 |
| A_23_P374902   | CLDND2       | claudin domain containing 2                                     | 7.12309        | 14.9486 | 22.0703 | 44.285    | 333.445 | 120.764 |
| A_21_P0012948  |              |                                                                 | 8.95472        | 10.2219 | 4.10119 | 22.8988   | 119.552 | 102.415 |
| A_24_P45446    | GBP4         | guanylate binding protein 4                                     | 102.825        | 78.3971 | 35.9632 | 852.591   | 183.762 | 1357.83 |
| A_21_P0000140  | LEPROT       | leptin receptor overlapping transcript                          | 589.763        | 685.108 | 487.175 | 5742.92   | 3688.93 | 6683.25 |
| A_23_P118392   | RASD1        | ras related dexamethasone induced 1                             | 40.0419        | 27.3902 | 26.7167 | 121.272   | 562.359 | 301.867 |
| A_33_P3328637  | PRRG1        | proline rich and Gla domain 1                                   | 60.9817        | 53.6597 | 31.4689 | 468.549   | 240.003 | 627.598 |
| A_23_P16469    | PLAUR        | plasminogen activator, urokinase receptor                       | 523.403        | 403.15  | 140.036 | 3748.74   | 2708.49 | 1975.11 |
| A_33_P3217020  | RAPH1        | Ras association (RalGDS/AF-6) and pleckstrin homology domains 1 | 72.8376        | 92.8604 | 101.395 | 222.613   | 2413.39 | 857.735 |
| A_21_P0000295  | SNORA67      | small nucleolar RNA, H/ACA box 67                               | 539.334        | 1579.7  | 177.928 | 4642.72   | 7638.99 | 2784.75 |
| A_19_P00315452 | LOC100130938 | uncharacterized LOC100130938                                    | 214.874        | 52.808  | 59.5999 | 670.15    | 1009.44 | 621.961 |
| A_33_P3415430  | HSPA1B       | heat shock protein family A (Hsp70) member 1B                   | 2172.87        | 1750.22 | 4993.98 | 6966.14   | 52383.4 | 31948.7 |
| A_21_P0008727  |              |                                                                 | 3.83387        | 10.4382 | 7.34173 | 74.0263   | 24.4419 | 99.4205 |
| A_32_P196142   | LOC100130938 | uncharacterized LOC100130938                                    | 247.071        | 59.9784 | 73.4282 | 823.368   | 1184.06 | 663.146 |
| A_21_P0014789  |              |                                                                 | 3.49901        | 3.49105 | 3.54478 | 13.6886   | 114.95  | 15.604  |
| A_23_P29769    | WWTR1        | WW domain containing transcription regulator 1                  | 104.714        | 116.261 | 33.8843 | 464.917   | 847.633 | 589.763 |
| A_24_P305784   | SPANXB1      | SPANX family member B1                                          | 5.57476        | 7.35558 | 8.07849 | 26.9905   | 60.5201 | 113.053 |
| A_33_P3259821  | DOCK9        | dedicator of cytokinesis 9                                      | 111.573        | 76.3372 | 59.5054 | 722.188   | 1008    | 385.69  |
| A_24_P382187   | IGFBP4       | insulin like growth factor binding protein 4                    | 86.4201        | 72.1176 | 17.0535 | 264.918   | 651.028 | 338.741 |
| A_21_P0001258  |              |                                                                 | 4.79358        | 4.22635 | 5.29449 | 14.3199   | 39.735  | 102.961 |
| A_33_P3299309  | RPL28        | ribosomal protein L28                                           | 5.3286         | 13.0684 | 11.6951 | 35.0061   | 118.769 | 105.872 |
| A_33_P3246505  | MAP3K8       | mitogen-activated protein kinase kinase kinase 8                | 72.7418        | 103.224 | 61.6982 | 345.604   | 865.978 | 818.67  |
| A_33_P3353343  | SRRM2        | serine/arginine repetitive matrix 2                             | 44.8205        | 86.4507 | 67.0975 | 241.259   | 1536.76 | 367.272 |
| A_33_P3272553  | NCAPH2       | non-SMC condensin II complex subunit H2                         | 63.8379        | 133.954 | 87.0939 | 352.941   | 1596.81 | 687.919 |
| A_33_P3284763  | DMD          | dystrophin                                                      | 15.5613        | 35.3845 | 22.9918 | 54.7402   | 424.857 | 277.557 |
| A_21_P0004591  | MLLT4-AS1    | AFDN divergent transcript                                       | 13.8257        | 14.7419 | 7.92102 | 88.8536   | 134.343 | 68.8041 |
| A_21_P0005325  |              |                                                                 | 13.6875        | 8.32635 | 6.81518 | 24.33     | 140.235 | 110.407 |
| A_24_P290770   | OGDH         | oxoglutarate dehydrogenase                                      | 48.3001        | 52.7584 | 49.1374 | 247.424   | 408.516 | 592.907 |
| A_19_P00318213 | HCG18        | HLA complex group 18                                            | 112.115        | 83.1209 | 89.8889 | 264.968   | 1205.88 | 1214.68 |
| A_33_P3381305  |              |                                                                 | 271.555        | 326.77  | 217.35  | 1606.72   | 1505.65 | 3672.52 |
| A_33_P3311551  | WLS          | Wnt ligand secretion mediator                                   | 65.7306        | 101.314 | 55.3646 | 420.916   | 566.777 | 701.906 |
| A_23_P160968   | LAMC2        | laminin subunit gamma 2                                         | 1768.24        | 907.735 | 985.443 | 7202.48   | 7273.53 | 13498.3 |
| A_23_P154217   | ITGB6        | integrin subunit beta 6                                         | 37.4855        | 12.141  | 10.7132 | 248.576   | 64.9046 | 132.966 |
| A_24_P152404   | C10orf76     | armadillo-like helical domain containing 3                      | 215.264        | 151.071 | 143.971 | 964.054   | 1859.59 | 1139.17 |
| A_33_P3237874  | TROAP        | trophinin associated protein                                    | 151.941        | 542.697 | 94.4219 | 824.49    | 2409.65 | 1676.85 |
| A_21_P0000023  | RIOK2        | RIO kinase 2                                                    | 13.0446        | 22.3789 | 11.8017 | 41.6884   | 159.421 | 216.265 |
| A_23_P218131   | INF2         | inverted formin, FH2 and WH2 domain containing                  | 326.073        | 782.245 | 386.85  | 2011.22   | 8132.61 | 2485.12 |
| A_24_P250227   | NR1D1        | nuclear receptor subfamily 1 group D member 1                   | 44.096         | 42.6855 | 139.066 | 226.837   | 755.156 | 629.427 |
| A_24_P169688   | MICB         | MHC class I polypeptide-related sequence B                      | 71.1282        | 130.286 | 46.2337 | 239.245   | 869.494 | 831.461 |

|                |              |                                                                 |          |         |         |         |         |         |
|----------------|--------------|-----------------------------------------------------------------|----------|---------|---------|---------|---------|---------|
| A_33_P3251932  | BCL2L11      | BCL2 like 11                                                    | 152.152  | 156.729 | 133.262 | 532.344 | 2395.02 | 990.476 |
| A_24_P50908    | TRIM11       | tripartite motif containing 11                                  | 118.147  | 396.183 | 101.852 | 620.269 | 2248.83 | 1337.87 |
| A_33_P3225937  | CRYZL1       | crystallin zeta like 1                                          | 43.1672  | 58.4616 | 38.909  | 177.631 | 306.116 | 691.425 |
| A_24_P123408   | ABLIM3       | actin binding LIM protein family member 3                       | 38.683   | 107.007 | 59.6228 | 321.203 | 468.223 | 614.782 |
| A_33_P3266719  | TET2         | tet methylcytosine dioxygenase 2                                | 22.161   | 11.7392 | 19.4152 | 178.923 | 105.842 | 96.3697 |
| A_33_P3230541  |              |                                                                 | 7.81274  | 7.612   | 3.72039 | 37.5506 | 81.4057 | 26.0705 |
| A_33_P3213772  | SRGAP2       | SLIT-ROBO Rho GTPase activating protein 2                       | 964.625  | 1202.39 | 537.734 | 10543   | 3709.94 | 5742.92 |
| A_33_P3319261  | EXD3         | exonuclease 3'-5' domain containing 3                           | 310.258  | 225.039 | 365.728 | 1150.06 | 3785.54 | 2100.21 |
| A_33_P3325978  |              |                                                                 | 28.1263  | 79.3194 | 46.3107 | 159.58  | 394.944 | 571.731 |
| A_23_P309381   | HIST2H2AA4   | histone cluster 2 H2A family member a4                          | 852.257  | 174.573 | 964.054 | 3200.5  | 2664.11 | 5817.18 |
| A_23_P201939   | PPM1J        | protein phosphatase, Mg2+/Mn2+ dependent 1J                     | 344.718  | 127.364 | 264.17  | 1971.02 | 1262.75 | 1610.5  |
| A_33_P3280603  | PPP4R1L      | protein phosphatase 4 regulatory subunit 1 like (pseudogene)    | 21.7913  | 19.0408 | 11.2273 | 141.311 | 70.1322 | 162.443 |
| A_33_P3236392  | PVRL4        | nectin cell adhesion molecule 4                                 | 481.254  | 326.996 | 348.984 | 1980.69 | 6469.8  | 1423.98 |
| A_23_P258410   | WNT7A        | Wnt family member 7A                                            | 97.3811  | 91.9476 | 138.612 | 317.911 | 784.785 | 1614.16 |
| A_33_P3320888  | CREB3L2      | cAMP responsive element binding protein 3 like 2                | 46.1074  | 30.4152 | 32.7031 | 167.705 | 309.152 | 286.272 |
| A_24_P937325   | FGD4         | FYVE, RhoGEF and PH domain containing 4                         | 27.3234  | 18.148  | 20.5572 | 127.403 | 141.801 | 180.661 |
| A_19_P00806098 | LOC100130938 | uncharacterized LOC100130938                                    | 181.26   | 70.149  | 66.6124 | 620.303 | 872.661 | 499.633 |
| A_33_P3327097  | MTMR1        | myotubularin related protein 1                                  | 59.0905  | 84.5968 | 12.8538 | 227.721 | 309.784 | 287.219 |
| A_33_P3258660  | SCD5         | stearoyl-CoA desaturase 5                                       | 61.0873  | 216.987 | 83.6013 | 557.501 | 776.06  | 766.469 |
| A_33_P3278868  | HEATR5A      | HEAT repeat containing 5A                                       | 335.364  | 161.487 | 214.17  | 1379.99 | 705.378 | 3554.3  |
| A_24_P927716   | SLED1        | proteoglycan 3, pro eosinophil major basic protein 2 pseudogene | 4.82711  | 5.25341 | 3.83823 | 17.8571 | 59.9123 | 26.8524 |
| A_21_P0014863  | PPP2R5C      | protein phosphatase 2 regulatory subunit B'gamma                | 229.26   | 305.409 | 261.726 | 1314.77 | 1804.61 | 2262.59 |
| A_33_P3266828  | TMEM8B       | transmembrane protein 8B                                        | 261.29   | 273.247 | 344.548 | 1385.67 | 2389.77 | 2169.04 |
| A_24_P288685   | IL13RA1      | interleukin 13 receptor subunit alpha 1                         | 135.232  | 89.8114 | 61.97   | 509.122 | 602.691 | 699.054 |
| A_23_P153320   | ICAM1(CD54)  | intercellular adhesion molecule 1                               | 878.03   | 758.86  | 240.641 | 3839.84 | 2589.28 | 4455.57 |
| A_21_P0004295  | CDC42SE2     | CDC42 small effector 2                                          | 5.88567  | 10.9404 | 5.42144 | 12.364  | 19.7263 | 38.1281 |
| A_33_P3368695  | HES7         | hes family bHLH transcription factor 7                          | 76.4086  | 54.5968 | 15.9254 | 278.434 | 343.579 | 189.809 |
| A_33_P3246022  |              |                                                                 | 11.2698  | 12.952  | 6.18925 | 32.1742 | 156.984 | 48.4095 |
| A_33_P3296499  | PTPRK        | protein tyrosine phosphatase, receptor type K                   | 72.7368  | 176.599 | 103.342 | 485.813 | 1303.35 | 567.048 |
| A_23_P1912     | ZP1          | zona pellucida glycoprotein 1                                   | 4.29754  | 11.239  | 4.33624 | 24.7706 | 65.6896 | 33.7196 |
| A_23_P71727    | CKS2         | CDC28 protein kinase regulatory subunit 2                       | 2276.28  | 5690.95 | 1006.42 | 9178.26 | 18943.3 | 19018.7 |
| A_23_P39840    | VAMP5        | vesicle associated membrane protein 5                           | 117.66   | 33.6202 | 96.9135 | 362.67  | 459.229 | 579.664 |
| A_32_P10133    | Inc-THNSL1-2 |                                                                 | 164.128  | 208.432 | 94.298  | 339.277 | 1479.37 | 1588.17 |
| A_33_P3340828  |              |                                                                 | 11.2842  | 31.3949 | 8.1207  | 41.4558 | 147.084 | 116.508 |
| A_33_P3349597  |              |                                                                 | 371.264  | 459.825 | 332.317 | 1874.2  | 1838.14 | 4059.02 |
| A_23_P74737    | EYA3         | EYA transcriptional coactivator and phosphatase 3               | 19.4419  | 15.2226 | 15.2333 | 80.7004 | 93.3705 | 147.451 |
| A_21_P0010942  | FAM25A       | family with sequence similarity 25 member A                     | 56.1479  | 87.0817 | 123.184 | 356.075 | 678.2   | 606.727 |
| A_23_P204436   | GIT2         | GIT ArfGAP 2                                                    | 38.6883  | 99.4576 | 26.1005 | 416.49  | 143.971 | 404.744 |
| A_33_P3278303  |              |                                                                 | 497.707  | 820.415 | 478.522 | 2700.98 | 2822.26 | 6173.02 |
| A_33_P3306973  |              |                                                                 | 84.7454  | 143.938 | 53.5712 | 384.757 | 643.307 | 628.426 |
| A_32_P34138    | FAM25A       | family with sequence similarity 25 member A                     | 315.506  | 405.107 | 573.926 | 1913.7  | 3370.81 | 2700.98 |
| A_23_P34396    | RSRP1        | arginine and serine rich protein 1                              | 789.076  | 244.665 | 550.277 | 2115.59 | 3795.09 | 3106.72 |
| A_23_P39237    | ZFP36        | ZFP36 ring finger protein                                       | 1349.73  | 682.864 | 1187.24 | 2821.33 | 10936.4 | 8312.29 |
| A_23_P61466    | CD163L1      | CD163 molecule like 1                                           | 246.945  | 97.9677 | 109.81  | 670.424 | 641.68  | 1443.33 |
| A_33_P3307955  | ABCD3        | ATP binding cassette subfamily D member 3                       | 78.0094  | 52.0685 | 27.1389 | 357.456 | 171.074 | 421.195 |
| A_23_P397238   | FKBP1A       | FKBP prolyl isomerase 1A                                        | 108.396  | 72.7219 | 37.9287 | 453.789 | 262.815 | 580.853 |
| A_33_P3310415  |              |                                                                 | 6.0487   | 3.68919 | 3.61716 | 13.3811 | 58.2356 | 23.9522 |
| A_21_P0000398  | SNORD117     | small nucleolar RNA, C/D box 117                                | 9.06548  | 12.4352 | 16.2821 | 89.3613 | 119.655 | 38.989  |
| A_24_P365679   | RRP7B        | ribosomal RNA processing 7 homolog B, pseudogene                | 10.2396  | 3.43126 | 7.73799 | 61.4675 | 19.754  | 50.8023 |
| A_33_P3348872  | PRDM16       | PR/SET domain 16                                                | 41.1191  | 59.1845 | 36.98   | 193.103 | 337.348 | 312.932 |
| A_33_P3349843  |              |                                                                 | 8.96939  | 13.4742 | 13.9131 | 28.0444 | 120.298 | 110.821 |
| A_23_P217475   | IDS          | iduronate 2-sulfatase                                           | 963.073  | 806.499 | 465.665 | 3174.77 | 4983.98 | 5067.52 |
| A_33_P3341787  |              |                                                                 | 61.1703  | 54.1359 | 21.5766 | 182.874 | 311.277 | 276.661 |
| A_23_P156310   | SKP2         | S-phase kinase associated protein 2                             | 84.121   | 121.319 | 106.678 | 528.491 | 697.322 | 640.197 |
| A_24_P307974   | TAF8         | TATA-box binding protein associated factor 8                    | 64.7902  | 158.455 | 47.5928 | 369.101 | 612.56  | 457.608 |
| A_21_P0000234  | SNORD38B     | small nucleolar RNA, C/D box 38B                                | 227.678  | 273.414 | 137.963 | 732.114 | 2696.69 | 911.421 |
| A_21_P0000393  | SNORD99      | small nucleolar RNA, C/D box 99                                 | 194.019  | 126.431 | 87.705  | 459.393 | 1563.11 | 618.63  |
| A_23_P67980    | KLF7         | Kruppel like factor 7                                           | 119.857  | 165.451 | 216.9   | 664.703 | 1869    | 706.732 |
| A_24_P160401   | CDCP1        | CUB domain containing protein 1                                 | 198.191  | 261.52  | 235.24  | 581.179 | 2525.09 | 1646.58 |
| A_33_P3347320  | ADIRF-AS1    | ADIRF antisense RNA 1                                           | 130.103  | 130.511 | 149.26  | 631.213 | 1398.97 | 564.773 |
| A_23_P149050   | LINC00115    | long intergenic non-protein coding RNA 115                      | 102.506  | 63.3294 | 89.2831 | 322.671 | 1246.18 | 282.04  |
| A_23_P420196   | SOCS1        | suppressor of cytokine signaling 1                              | 60.0823  | 28.1748 | 134.333 | 295.101 | 314.923 | 476.225 |
| A_23_P201636   | LAMC2        | laminin subunit gamma 2                                         | 146.14.3 | 10860.6 | 9864.04 | 61704.8 | 40363.1 | 120602  |
| A_19_P00319080 |              |                                                                 | 26.3164  | 13.4974 | 28.1094 | 76.5684 | 139.283 | 178.341 |
| A_33_P3289701  | OR2T12       | olfactory receptor family 2 subfamily T member 12               | 9.02512  | 5.8288  | 4.35991 | 25.157  | 26.3258 | 65.8883 |
| A_33_P3589722  | ATM          | ATM serine/threonine kinase                                     | 173.946  | 61.7684 | 177.443 | 481.254 | 685.108 | 1085.88 |
| A_23_P141894   | PVR          | poliovirus receptor                                             | 90.5114  | 65.7306 | 28.8995 | 360.889 | 260.906 | 337.869 |
| A_24_P415624   | MLXIP        | MLX interacting protein                                         | 47.9632  | 100.7   | 75.5959 | 366.686 | 254.905 | 714.373 |
| A_33_P3384885  | ZNF511       | zinc finger protein 511                                         | 42.6468  | 53.7075 | 50.2771 | 186.748 | 569.649 | 195.843 |
| A_23_P211428   | SMTN         | smoothelin                                                      | 49.5085  | 40.9374 | 53.3109 | 194.142 | 251.465 | 398.704 |
| A_21_P0013999  |              |                                                                 | 24.3145  | 59.3623 | 27.0786 | 91.8152 | 303.87  | 251.348 |
| A_33_P3337977  | FIG4         | FIG4 phosphoinositide 5-phosphatase                             | 23.9905  | 23.9602 | 24.2573 | 96.947  | 200.01  | 126.397 |
| A_33_P3388466  | BTN3A1       | butyrophilin subfamily 3 member A1                              | 28.9643  | 24.5682 | 26.8136 | 114.365 | 102.16  | 281.142 |
| A_33_P3351566  | ETNK1        | ethanolamine kinase 1                                           | 46.4553  | 15.3154 | 19.2285 | 81.4154 | 193.201 | 149.701 |
| A_23_P256603   | AFDN         | afadin, adherens junction formation factor                      | 43.1507  | 47.6918 | 14.7681 | 135.932 | 208.928 | 179.46  |
| A_33_P3210916  | SEC13        | SEC13 homolog, nuclear pore and COPII coat complex component    | 6.0371   | 10.0989 | 5.99567 | 19.4345 | 60.4621 | 51.9916 |
| A_33_P3239634  | NFYA         | nuclear transcription factor Y subunit alpha                    | 42.9517  | 52.4262 | 55.2651 | 110.219 | 629.877 | 298.784 |
| A_24_P350744   | KHDC4        | KH domain containing 4, pre-mRNA splicing factor                | 56.3923  | 56.5621 | 59.1056 | 134.669 | 776.295 | 295.368 |
| A_33_P3376379  | CNST         | consortin, connexin sorting protein                             | 126.431  | 97.3682 | 52.7945 | 263.961 | 891.508 | 447.439 |
| A_21_P0000302  | SNORA8       | small nucleolar RNA, H/ACA box 8                                | 477.573  | 369.44  | 253.208 | 1981.96 | 3083.73 | 1178.32 |
| A_24_P359191   | SLC6A6       | solute carrier family 6 member 6                                | 41.7775  | 91.2674 | 51.4056 | 146.837 | 411.004 | 517.219 |
| A_33_P3331511  | LINC00173    | long intergenic non-protein coding RNA 173                      | 69.3119  | 28.3044 | 33.0572 | 171.747 | 242.024 | 247.664 |
| A_33_P3225268  | QSOX1        | quiescin sulfhydryl oxidase 1                                   | 259.272  | 230.305 | 153.677 | 2061    | 451.425 | 1564.15 |
| A_33_P3313948  | KLF11        | Kruppel like factor 11                                          | 3.44423  | 13.7006 | 3.44998 | 19.6705 | 41.8905 | 30.0489 |
| A_33_P3302245  | TMEM59L      | transmembrane protein 59 like                                   | 37.1586  | 19.6816 | 30.7792 | 189.555 | 217.253 | 82.1686 |
| A_33_P3373765  | DRD4         | dopamine receptor D4                                            | 139.128  | 110.186 | 225.151 | 1090.1  | 526.977 | 895.672 |
| A_33_P3214119  |              |                                                                 | 65.2368  | 24.14   | 15.0431 | 149.762 | 204.619 | 114.612 |
| A_23_P56288    | LENG8        | leukocyte receptor cluster member 8                             | 82.9891  | 60.149  | 52.1558 | 815.476 | 241.343 | 193.326 |
| A_33_P3408529  |              |                                                                 | 4.66147  | 4.14951 | 4.99068 | 61.309  | 11.9305 | 19.067  |
| A_33_P3231613  | Inc-CSAG1-1  |                                                                 | 42.1193  | 14.3296 | 25.0221 | 158.997 | 141.616 | 95.8996 |
| A_21_P0000453  | SNORD115-37  | small nucleolar RNA, C/D box 115-37                             | 4.30834  | 6.66681 | 3.89427 | 12.8074 | 26.5276 | 46.9231 |
| A_33_P3389178  | RAPGEF3      | Rap guanine nucleotide exchange factor 3                        | 277.872  | 209.298 | 152.332 | 672.744 | 2130.43 | 875.113 |
| A_33_P3330991  | LOC100134237 |                                                                 | 51.6112  | 67.1946 | 35.5987 | 215.682 | 199.776 | 401.336 |
| A_33_P3330877  |              |                                                                 | 4.39516  | 16.1315 | 4.04658 | 31.0624 | 43.5231 | 29.2588 |
| A_33_P3258824  | NOTCH2       | notch receptor 2                                                | 2156.93  | 2334.02 | 684.552 | 7451.52 | 5249.69 | 12108.7 |
| A_33_P3225273  | QSOX1        | quiescin sulfhydryl oxidase 1                                   | 82.6356  | 68.4057 | 63.3438 | 612.648 | 182.483 | 439.085 |
| A_33_P3417751  | C1orf61      | chromosome 1 open reading frame 61                              | 11.6406  | 10.5268 | 4.80135 | 23.5269 | 69.5776 | 49.2624 |
| A_24_P182494   | DUSP10       | dual specificity phosphatase 10                                 | 197.276  | 142.248 | 74.5782 | 660.271 | 1015.51 | 424.509 |
| A_33_P3264399  |              |                                                                 | 5.27163  | 10.5686 | 3.53119 | 24.5772 | 50.8062 | 21.3411 |
| A_33_P3213468  | ANKRD33B     | ankyrin repeat domain 33B                                       | 24.6774  | 46.4455 | 18.0372 | 114.92  | 119.7   | 202.66  |
| A_33_P3265956  | CBFA2T2      | CBFA2/RUNX1 translocation partner 2                             | 792.876  | 465.471 | 358.235 | 2562.1  | 2945.73 | 2352.23 |

|                |              |                                                                                |         |         |         |         |         |         |
|----------------|--------------|--------------------------------------------------------------------------------|---------|---------|---------|---------|---------|---------|
| A_24_P352116   | SNHG7        | small nucleolar RNA host gene 7                                                | 109.229 | 242.345 | 70.7738 | 429.295 | 1178.7  | 487.93  |
| A_21_P0001685  | LOC102724481 | long intergenic non-protein coding RNA 1702                                    | 11.6906 | 15.5247 | 10.5078 | 28.9686 | 118.529 | 71.1407 |
| A_24_P285032   | IDS          | iduronate 2-sulfatase                                                          | 81.0422 | 88.2076 | 46.8958 | 282.194 | 368.371 | 412.313 |
| A_23_P119143   | ICAM5        | intercellular adhesion molecule 5                                              | 147.002 | 151.557 | 412.94  | 669.951 | 2033.91 | 844.458 |
| A_19_P00806473 |              |                                                                                | 28.0626 | 42.7787 | 55.7293 | 187.766 | 441.836 | 99.1731 |
| A_33_P3359781  | CD99         | CD99 molecule (Xg blood group)                                                 | 3.91093 | 13.3045 | 4.85736 | 28.1485 | 31.0694 | 35.5265 |
| A_33_P3339036  | MECP2        | methyl-CpG binding protein 2                                                   | 755.156 | 568.596 | 640.197 | 2589.28 | 3458.14 | 3684.98 |
| A_33_P3399263  | IL15RA       | interleukin 15 receptor subunit alpha                                          | 124.994 | 156.876 | 64.7154 | 589.941 | 287.446 | 893.162 |
| A_33_P3265159  | GAPVD1       | GTase activating protein and VPS9 domains 1                                    | 22.8107 | 9.55442 | 7.76361 | 37.766  | 86.9681 | 60.7836 |
| A_21_P0012073  |              |                                                                                | 82.5248 | 70.7545 | 92.8748 | 268.906 | 543.656 | 431.306 |
| A_33_P3350863  | RETN         | resistin                                                                       | 14.1189 | 16.6495 | 10.9048 | 32.9823 | 122.929 | 73.3787 |
| A_23_P259292   | C1QTNF5      | C1q and TNF related 5                                                          | 38.2791 | 58.2428 | 47.8235 | 150.15  | 302.116 | 266.797 |
| A_21_P0012224  |              |                                                                                | 43.2874 | 58.9133 | 47.8454 | 161.39  | 312.168 | 271.444 |
| A_33_P3486059  |              |                                                                                | 11.1432 | 5.8353  | 7.64042 | 35.318  | 43.9876 | 35.8279 |
| A_33_P3324137  | PRO0628      | hypothetical protein LOC643837                                                 | 198.077 | 149.171 | 95.2673 | 463.236 | 952.223 | 711.2   |
| A_21_P0007160  | LOC101928443 |                                                                                | 46.096  | 60.5118 | 58.8233 | 177.206 | 350.15  | 289.796 |
| A_21_P0011816  | IGSF3        | immunoglobulin superfamily member 3                                            | 21.5177 | 20.807  | 26.5816 | 125.935 | 88.457  | 115.377 |
| A_23_P53345    | ARNTL2       | aryl hydrocarbon receptor nuclear translocator like 2                          | 537.939 | 159.927 | 268.028 | 1296.25 | 822.742 | 2289.54 |
| A_33_P3325120  | SOX13        | SRY-box 13                                                                     | 32.5756 | 32.9034 | 85.0997 | 223.247 | 171.693 | 249.287 |
| A_33_P3240843  | TMEM71       | transmembrane protein 71                                                       | 75.1125 | 124.883 | 81.3793 | 274.492 | 518.119 | 557.146 |
| A_23_P336554   | IL1RAP       | interleukin 1 receptor accessory protein                                       | 126.156 | 108.489 | 89.6398 | 568.113 | 684.363 | 318.901 |
| A_33_P3368900  |              |                                                                                | 76.8864 | 76.1708 | 58.4616 | 176.393 | 310.961 | 623.157 |
| A_32_P213831   | STRIP2       | striatin interacting protein 2                                                 | 79.557  | 64.9634 | 28.7047 | 234.577 | 294.998 | 212.981 |
| A_33_P3208975  | OR51S1       | olfactory receptor family 51 subfamily S member 1                              | 6.48126 | 5.01973 | 3.6083  | 11.5109 | 42.5726 | 23.4587 |
| A_33_P3396492  | CDH24        | cadherin 24                                                                    | 90.8561 | 72.3175 | 30.5826 | 242.142 | 263.998 | 307.005 |
| A_21_P0000173  | C5orf56      | chromosome 5 open reading frame 56                                             | 796.259 | 791.844 | 857.088 | 3278.41 | 2212.14 | 7183.55 |
| A_21_P0002142  | SPATA3-AS1   | SPATA3 antisense RNA 1 (head to head)                                          | 244.665 | 319.405 | 310.784 | 970.533 | 1625.93 | 1469.62 |
| A_23_P38618    | PIGL         | phosphatidylinositol glycan anchor biosynthesis class L                        | 262.752 | 113.672 | 114.95  | 670.35  | 576.276 | 840.832 |
| A_33_P3213408  | OR10AD1      | olfactory receptor family 10 subfamily AD member 1                             | 10.838  | 17.5934 | 4.17645 | 42.9881 | 49.5026 | 35.3142 |
| A_24_P158285   | CYLC2        | cylicin 2                                                                      | 4.64297 | 3.51872 | 3.52344 | 29.8308 | 10.6227 | 17.0535 |
| A_21_P0002746  |              |                                                                                | 230.928 | 302.63  | 354.704 | 1058.15 | 1587.13 | 1366.33 |
| A_33_P3232498  | PCARE        | photoreceptor cilium actin regulator                                           | 5.7372  | 6.07089 | 9.55769 | 15.2839 | 32.8487 | 61.2884 |
| A_24_P206604   | PFKFB3       | 6-phosphofructo-2-kinase/fructose-2,6-bisphosphatase 3                         | 29.8232 | 23.226  | 21.3364 | 80.3653 | 137.525 | 122.929 |
| A_33_P3254666  | LZT52        | leucine zipper tumor suppressor 2                                              | 227.892 | 240.036 | 345.326 | 610.054 | 1834.54 | 1531.32 |
| A_21_P0000360  | SNORA77      | small nucleolar RNA, H/ACA box 77                                              | 83.2089 | 109.399 | 127.992 | 330.408 | 643.863 | 492.489 |
| A_33_P3243399  | SLMAP        | sarcolemma associated protein                                                  | 96.043  | 43.8114 | 56.4451 | 192.724 | 461.28  | 240.163 |
| A_33_P3242663  | VASH2        | vasohibin 2                                                                    | 14.0162 | 15.3346 | 10.8897 | 28.9043 | 107.996 | 67.2892 |
| A_33_P3315074  |              |                                                                                | 46.1716 | 63.9428 | 36.2111 | 175.671 | 178.222 | 304.983 |
| A_21_P0010339  |              |                                                                                | 8.79132 | 19.0017 | 8.66842 | 27.1678 | 84.9986 | 55.8613 |
| A_24_P208081   | PLA2G2F      | phospholipase A2 group IIF                                                     | 29.698  | 50.232  | 34.4843 | 99.7526 | 227.096 | 202.065 |
| A_33_P3291708  |              |                                                                                | 32.4602 | 45.8158 | 34.3221 | 117.501 | 192.252 | 200.48  |
| A_24_P67898    | OGA          | O-GlcNAcase                                                                    | 523.798 | 157.193 | 169.086 | 1505.86 | 1040.12 | 786.471 |
| A_33_P3362239  |              |                                                                                | 136.624 | 148.685 | 104.796 | 468.476 | 462.286 | 863.409 |
| A_33_P3212645  | NOTCH2NL     | notch 2 N-terminal like A                                                      | 6804    | 6652.01 | 2296.33 | 20517.4 | 13846.8 | 31861.9 |
| A_21_P0003367  | LOC101928785 |                                                                                | 4.11858 | 3.42227 | 6.99109 | 19.1907 | 15.2034 | 28.7027 |
| A_23_P15394    | CD68         | CD68 molecule                                                                  | 210.949 | 577.387 | 348.295 | 1035.36 | 1268.1  | 2739.16 |
| A_23_P408768   | DOT1L        | DOT1 like histone lysine methyltransferase                                     | 43.399  | 68.3245 | 44.6206 | 133.86  | 273.389 | 305.868 |
| A_21_P0009972  | LINC01273    | long intergenic non-protein coding RNA 1273                                    | 125.646 | 79.5453 | 41.9911 | 320.947 | 402.482 | 271.791 |
| A_24_P556318   | SAA3P        | serum amyloid A3, pseudogene                                                   | 3.70348 | 6.85683 | 6.29881 | 34.6701 | 15.4137 | 24.9977 |
| A_21_P0014256  | STK32C       | serine/threonine kinase 32C                                                    | 858.105 | 852.409 | 994.669 | 3705.4  | 4203.51 | 3894.93 |
| A_23_P93658    | ASIC3        | acid sensing ion channel subunit 3                                             | 6.95259 | 16.4868 | 12.8996 | 30.8416 | 59.4804 | 66.141  |
| A_33_P3268129  | LINC00862    | long intergenic non-protein coding RNA 862                                     | 5.74005 | 3.97178 | 4.2683  | 26.1928 | 18.5868 | 16.1382 |
| A_23_P200801   | PDE4DIP      | phosphodiesterase 4D interacting protein                                       | 93.4468 | 90.7779 | 75.2664 | 241.304 | 324.07  | 655.25  |
| A_23_P156732   | PHF1         | PHD finger protein 1                                                           | 323.258 | 467.316 | 383.014 | 1271.97 | 1906.52 | 1911.22 |
| A_33_P3385656  | FNDC9        | fibronectin type III domain containing 9                                       | 26.6829 | 23.5525 | 34.4388 | 70.4772 | 181.379 | 135.475 |
| A_21_P0001492  | LINC01343    | long intergenic non-protein coding RNA 1343                                    | 16.0295 | 13.2655 | 18.6067 | 73.9765 | 72.5797 | 58.0463 |
| A_24_P119259   | BLZF1        | basic leucine zipper nuclear factor 1                                          | 24.7288 | 18.9525 | 20.8848 | 42.3039 | 153.817 | 116.727 |
| A_21_P0012143  |              |                                                                                | 9.93136 | 13.1873 | 11.162  | 39.9043 | 101.996 | 27.7992 |
| A_23_P162010   | CCKBR        | cholecystokinin B receptor                                                     | 4.67143 | 3.72512 | 7.54658 | 24.4864 | 19.9285 | 20.6936 |
| A_21_P0009321  | LOC101929494 |                                                                                | 65.0318 | 86.1221 | 39.0608 | 240.366 | 250.627 | 276.076 |
| A_33_P3262012  |              |                                                                                | 562.877 | 1289.52 | 545.318 | 1859.59 | 4919.52 | 3258.11 |
| A_33_P3396972  |              |                                                                                | 27.5101 | 34.4049 | 32.7809 | 85.5173 | 163.343 | 166.7   |
| A_33_P3326730  | CCDC183      | coiled-coil domain containing 183                                              | 13.9144 | 7.02593 | 6.63485 | 32.6706 | 27.4468 | 54.2201 |
| A_23_P23616    | PLEKHN1      | pleckstrin homology domain containing N1                                       | 94.8871 | 120.041 | 39.401  | 301.243 | 426.318 | 259.727 |
| A_23_P383819   | TBX3         | T-box 3                                                                        | 21.3133 | 33.9123 | 11.496  | 62.1418 | 98.4582 | 100.649 |
| A_33_P3259933  | Inc-RNF208-1 |                                                                                | 3.723   | 8.2105  | 3.98705 | 26.7422 | 15.4657 | 21.653  |
| A_33_P3267280  | CTDSP2       | CTD small phosphatase 2                                                        | 188.404 | 145.851 | 96.947  | 683.469 | 680.871 | 418.752 |
| A_21_P0000333  | SNORA46      | small nucleolar RNA, H/ACA box 46                                              | 33.9123 | 38.1617 | 28.8279 | 158.055 | 213.801 | 80.719  |
| A_23_P209394   | CFLAR        | CASP8 and FADD like apoptosis regulator                                        | 271.21  | 142.53  | 174.631 | 870.721 | 501.252 | 1129.37 |
| A_33_P3342628  | HES4         | hes family bHLH transcription factor 4                                         | 1224.24 | 8963.68 | 3269.16 | 27657   | 31251   | 30049.8 |
| A_33_P3311439  | GCH1         | GTP cyclohydrolase 1                                                           | 47.1838 | 110.394 | 52.808  | 222.795 | 265.497 | 336.224 |
| A_24_P290354   | ZFAND5       | zinc finger AN1-type containing 5                                              | 1672.97 | 1532.23 | 1741.59 | 6029.37 | 6752.79 | 7860.02 |
| A_33_P3384667  | DCAF5        | DDB1 and CUL4 associated factor 5                                              | 27.7194 | 47.2922 | 24.5415 | 80.9359 | 210.098 | 135.232 |
| A_33_P3231908  | POU3F3       | POU class 3 homeobox 3                                                         | 3.56001 | 5.92504 | 8.32139 | 22.9544 | 14.4187 | 37.6055 |
| A_23_P350555   | TCP10L       | t-complex 10 like                                                              | 14.3802 | 11.336  | 26.3164 | 83.7571 | 77.4974 | 46.787  |
| A_32_P205944   | RGPD5        | RANBP2-like and GRIP domain containing 5                                       | 868.749 | 360.675 | 238.147 | 2200.05 | 1581.57 | 1516.64 |
| A_33_P3289050  |              |                                                                                | 11.3284 | 11.7026 | 8.68374 | 23.2324 | 48.5401 | 72.0208 |
| A_23_P377245   | LOC653160    | uncharacterized LOC653160                                                      | 40.5996 | 18.3931 | 28.7341 | 108.997 | 107.914 | 127.046 |
| A_33_P3320718  | C16orf13     | methyltransferase like 26                                                      | 237.738 | 238.49  | 251.348 | 610.681 | 1620.44 | 1001    |
| A_33_P3404014  | FAM209B      | family with sequence similarity 209 member B                                   | 7.34541 | 4.38368 | 3.53879 | 14.6296 | 30.0104 | 17.8795 |
| A_33_P3407636  | YWHAE        | tyrosine 3-monooxygenase/tryptophan 5-monooxygenase activation protein epsilon | 50.2876 | 28.7266 | 33.7955 | 104.214 | 174.473 | 184.132 |
| A_21_P00003488 | LOC101929491 | uncharacterized LOC101929491                                                   | 15.55   | 7.18138 | 5.0016  | 42.2658 | 32.3027 | 27.714  |
| A_33_P3367392  | FAM167B      | family with sequence similarity 167 member B                                   | 104.594 | 97.5541 | 95.3175 | 308.933 | 468.009 | 443.211 |
| A_23_P96542    | VMA21        | vacuolar ATPase assembly factor VMA21                                          | 2008.27 | 3139.66 | 1562.05 | 5811.6  | 13644.8 | 8174.19 |
| A_33_P3280916  | SNHG4        | small nucleolar RNA host gene 4                                                | 6.99697 | 13.9759 | 11.0953 | 26.4539 | 74.1684 | 36.3624 |
| A_33_P3297217  | NAAA         | N-acylglutamine acid amidase                                                   | 161.545 | 82.5857 | 125.975 | 576.276 | 275.796 | 689.489 |
| A_33_P3344292  | SAMD4A       | sterile alpha motif domain containing 4A                                       | 11.1409 | 6.84855 | 7.96935 | 20.9765 | 48.5797 | 38.8205 |
| A_23_P159956   | MID2         | midline 2                                                                      | 292.564 | 200.055 | 166.496 | 1011.25 | 688.882 | 906.77  |
| A_33_P3289661  | OCR1         | ovarian cancer-related protein 1                                               | 7.85052 | 4.78735 | 7.53095 | 24.5811 | 36.6747 | 20.3482 |
| A_33_P3282963  |              |                                                                                | 26.1928 | 10.5378 | 19.4776 | 58.7298 | 80.495  | 73.4096 |
| A_33_P3671378  | CERCAM       | cerebral endothelial cell adhesion molecule                                    | 229.026 | 162.777 | 85.4885 | 719.038 | 453.092 | 629.62  |
| A_33_P3231472  | TOR1B        | torsin family 1 member B                                                       | 95.9389 | 78.2301 | 81.1    | 193.218 | 374.617 | 537.939 |
| A_33_P3314559  | RAB3C        | RAB3C, member RAS oncogene family                                              | 6.94479 | 9.71715 | 12.2494 | 31.6913 | 51.0821 | 32.6132 |
| A_33_P3330473  | RBM41        | RNA binding motif protein 41                                                   | 44.0177 | 30.0922 | 37.8713 | 114.575 | 157.051 | 173.173 |
| A_32_P231617   | TM4SF1       | transmembrane 4 L six family member 1                                          | 476.379 | 235.24  | 167.389 | 1286.7  | 883.747 | 1020.71 |
| A_24_P384029   |              |                                                                                | 9.74457 | 16.8031 | 8.64038 | 37.817  | 39.5161 | 57.841  |
| A_23_P129188   | CALML4       | calmodulin like 4                                                              | 187.766 | 96.3899 | 102.845 | 359.684 | 724.592 | 436.115 |
| A_33_P3317442  | MCF2L        | MCF.2 cell line derived transforming sequence like                             | 11.1358 | 28.875  | 16.0773 | 87.8777 | 71.5227 | 50.0231 |
| A_33_P3313846  | ZDHHC8       | zinc finger DHHC-type containing 8                                             | 60.1654 | 99.1377 | 93.9032 | 199.515 | 415.871 | 408.904 |
| A_33_P3274930  |              |                                                                                | 5.49126 | 7.13384 | 8.74266 | 22.9723 | 20.0518 | 44.7268 |
| A_24_P147398   | VPS53        | VPS53 subunit of GARP complex                                                  | 18.2885 | 16.0966 | 9.18092 | 69.1341 | 39.2551 | 59.6903 |

|                |              |                                                                                 |         |         |         |         |         |         |
|----------------|--------------|---------------------------------------------------------------------------------|---------|---------|---------|---------|---------|---------|
| A_24_P186943   | ELN          | elastin                                                                         | 60.0076 | 61.0396 | 64.4775 | 140.748 | 320.113 | 313.774 |
| A_23_P259580   | TAPBP        | TAP binding protein                                                             | 92.327  | 111.21  | 59.6406 | 278.365 | 376.959 | 348.372 |
| A_24_P305038   | CRHR1-IT1    | long intergenic non-protein coding RNA                                          | 49.166  | 80.6806 | 42.3914 | 128.065 | 379.116 | 206.457 |
| A_33_P3355252  |              |                                                                                 | 5.47087 | 11.2167 | 4.355   | 19.5061 | 21.138  | 37.817  |
| A_24_P358305   |              |                                                                                 | 38.1396 | 44.5626 | 15.6392 | 107.683 | 106.299 | 134.618 |
| A_33_P3233150  | ZSWIM4       | zinc finger SWIM-type containing 4                                              | 119.274 | 101.669 | 120.648 | 377.958 | 292.214 | 762.785 |
| A_21_P0014355  | LOC100134391 | uncharacterized LOC100134391                                                    | 57.4314 | 36.3212 | 56.5261 | 108.47  | 194.417 | 317.25  |
| A_23_P342053   | RBBP6        | RB binding protein 6, ubiquitin ligase                                          | 59.7859 | 78.8617 | 69.8959 | 146.198 | 419.292 | 298.063 |
| A_33_P3274245  | ENDOV        | endonuclease V                                                                  | 53.1596 | 76.7895 | 71.8811 | 185.873 | 305.868 | 279.676 |
| A_21_P0012869  | LOC728554    | THO complex 3 pseudogene                                                        | 26.0041 | 35.2851 | 15.5267 | 94.1917 | 59.3998 | 136.89  |
| A_33_P3286387  | EHMT1        | euchromatic histone lysine methyltransferase 1                                  | 50.4151 | 100.396 | 38.0603 | 176.1   | 222.109 | 263.601 |
| A_21_P0007476  | LINC00592    | long intergenic non-protein coding RNA 592                                      | 403.592 | 461.219 | 186.781 | 1525.55 | 1194.65 | 1016.53 |
| A_23_P134851   | DOK2         | docking protein 2                                                               | 6.35313 | 5.05727 | 3.71822 | 24.2299 | 19.4419 | 13.4323 |
| A_33_P3266923  | LMTK2        | lemur tyrosine kinase 2                                                         | 295.975 | 181.379 | 129.229 | 638.78  | 667.948 | 860.714 |
| A_23_P325205   | RCAN3        | RCAN family member 3                                                            | 153.817 | 152.447 | 133.677 | 506.041 | 515.902 | 633.32  |
| A_24_P915692   | PHLDA1       | pleckstrin homology like domain family A member 1                               | 250.561 | 264.272 | 145.372 | 710.732 | 603.633 | 1176.35 |
| A_23_P97064    | FBXO6        | F-box protein 6                                                                 | 78.1899 | 88.1365 | 85.9982 | 303.771 | 306.882 | 331.219 |
| A_23_P25994    | LGMN         | legumain                                                                        | 221.957 | 272.148 | 144.337 | 1016.69 | 440.408 | 1006.7  |
| A_33_P3423941  | IFITM1       | interferon induced transmembrane protein 1                                      | 2720.86 | 1096.13 | 2397.63 | 7752.24 | 5757.17 | 8225.67 |
| A_33_P3282252  |              |                                                                                 | 47.6818 | 28.5397 | 37.7991 | 129.487 | 160.192 | 126.468 |
| A_33_P3257553  | CNTRL        | centriolin                                                                      | 12.5966 | 10.7821 | 10.1224 | 27.5346 | 59.1705 | 42.6075 |
| A_33_P3223898  | PRSS45       | protease, serine 45                                                             | 7.5113  | 12.9598 | 5.31736 | 22.0123 | 41.9911 | 28.215  |
| A_33_P3376873  |              |                                                                                 | 78.9076 | 84.4592 | 33.9214 | 320.603 | 181.074 | 195.056 |
| A_33_P3366241  | SCARA5       | scavenger receptor class A member 5                                             | 18.9891 | 15.1612 | 11.4972 | 32.4602 | 79.2443 | 64.2645 |
| A_32_P222961   | SPIN4        | spindlin family member 4                                                        | 180.751 | 170.909 | 106.097 | 366.769 | 705.546 | 630.203 |
| A_21_P0004050  |              |                                                                                 | 5.03489 | 8.15191 | 6.98531 | 18.5057 | 17.0125 | 44.8418 |
| A_23_P31532    | ZC3HAV1L     | zinc finger CCCH-type containing, antiviral 1 like                              | 333.702 | 443     | 479.262 | 1069.01 | 1952.97 | 1662.67 |
| A_24_P55148    | HIST1H2BJ    | histone cluster 1 H2B family member j                                           | 306.071 | 324.559 | 310.043 | 1310.04 | 930.71  | 1234.31 |
| A_33_P3293753  | KRTAP10-9    | keratin associated protein 10-9                                                 | 31.2799 | 39.5759 | 36.9521 | 88.9214 | 143.537 | 173.481 |
| A_23_P118427   | MAP2K3       | mitogen-activated protein kinase kinase 3                                       | 315.74  | 335.94  | 129.099 | 1040.49 | 675.452 | 923     |
| A_21_P0003212  |              |                                                                                 | 446.625 | 419.919 | 240.684 | 1019.96 | 2016.92 | 1023.7  |
| A_33_P3231247  |              |                                                                                 | 9.14072 | 15.6987 | 8.30033 | 42.4511 | 34.8885 | 37.1124 |
| A_33_P3229067  | HIST1H2BN    | histone cluster 1 H2B family member n                                           | 187.898 | 171.028 | 275.468 | 832.524 | 626.307 | 768.369 |
| A_23_P24966    | USP2         | ubiquitin specific peptidase 2                                                  | 5.44971 | 7.42357 | 5.30041 | 14.0886 | 30.0691 | 22.8167 |
| A_21_P0009290  |              |                                                                                 | 28.4219 | 28.7309 | 30.7846 | 64.2603 | 154.99  | 113.323 |
| A_24_P257108   | TANK         | TRAF family member associated NFKB activator                                    | 73.2343 | 76.6219 | 85.435  | 187.898 | 451.716 | 252.933 |
| A_23_P62607    | IL22RA1      | interleukin 22 receptor subunit alpha 1                                         | 132.224 | 174.032 | 101.044 | 663.481 | 312.645 | 500.091 |
| A_24_P328504   | SP140        | SP140 nuclear body protein                                                      | 153.767 | 189.555 | 138.484 | 365.854 | 671.667 | 725.066 |
| A_33_P3248245  |              |                                                                                 | 14.7884 | 18.5868 | 15.9294 | 50.0366 | 76.1871 | 50.5864 |
| A_33_P3401428  | TMEM38B      | transmembrane protein 38B                                                       | 74.5782 | 132.394 | 63.0255 | 223.456 | 285.624 | 429.383 |
| A_33_P3278211  | MMRN2        | multimerin 2                                                                    | 49.7449 | 42.8735 | 45.0218 | 112.602 | 220.534 | 167.705 |
| A_33_P3337540  | IFNAR2       | interferon alpha and beta receptor subunit 2                                    | 507.95  | 437.395 | 338.687 | 972.421 | 1828.87 | 1828.29 |
| A_21_P0013492  | LOC101929488 | uncharacterized LOC101929488                                                    | 16.8126 | 27.4216 | 22.846  | 46.3015 | 101.768 | 95.7279 |
| A_21_P0002014  |              |                                                                                 | 4.51579 | 3.61286 | 3.61065 | 18.1357 | 9.38311 | 14.7167 |
| A_23_P19291    | TUBB2A       | tubulin beta 2A class IIA                                                       | 2310.92 | 1134.89 | 1131.86 | 5738.38 | 4295.44 | 5111.6  |
| A_24_P201153   | TJP2         | tight junction protein 2                                                        | 144.221 | 150.406 | 69.5489 | 534.058 | 355.848 | 336.569 |
| A_33_P3226228  |              |                                                                                 | 25.9549 | 25.114  | 16.2218 | 113.461 | 64.0987 | 61.405  |
| A_23_P428184   | HIST1H2AD    | histone cluster 1 H2A family member d                                           | 3795.09 | 2104.2  | 4646.09 | 10709   | 8981.26 | 16282.7 |
| A_24_P207479   | DEDD2        | death effector domain containing 2                                              | 1323.79 | 1209.58 | 1317.09 | 3253.89 | 8409.62 | 3251.19 |
| A_33_P3263412  |              |                                                                                 | 26.0423 | 29.2899 | 19.1354 | 70.9292 | 99.3935 | 86.7537 |
| A_33_P3390057  | TM4SF1       | transmembrane 4 L six family member 1                                           | 2031.94 | 840.532 | 903.164 | 4998.59 | 3640.35 | 3492.87 |
| A_33_P3363316  | LINC00957    | long intergenic non-protein coding RNA 957                                      | 14.4291 | 15.0006 | 15.5938 | 29.311  | 75.6579 | 62.6648 |
| A_33_P3341189  | UBE2A        | ubiquitin conjugating enzyme E2 A                                               | 2702.46 | 2140.98 | 1177.43 | 6500.47 | 7177.39 | 5999.79 |
| A_33_P3353275  |              |                                                                                 | 3.65358 | 6.14582 | 9.38748 | 25.8411 | 16.0473 | 20.8788 |
| A_21_P0012547  |              |                                                                                 | 11.854  | 18.094  | 11.142  | 31.6468 | 50.7157 | 60.8975 |
| A_33_P3405103  | FLYWCH1      | FLYWCH-type zinc finger 1                                                       | 143.571 | 194.231 | 210.822 | 454.4   | 618.799 | 850.987 |
| A_33_P3377763  | FLJ36000     | uncharacterized FLJ36000                                                        | 66.4846 | 51.6369 | 53.4346 | 138.577 | 356.106 | 151.284 |
| A_33_P3364836  |              |                                                                                 | 12.6913 | 9.49391 | 7.24431 | 30.4108 | 24.3103 | 47.8265 |
| A_33_P3265950  | CBFA2T2      | CBFA2/RUNX1 translocation partner 2                                             | 168.515 | 93.9032 | 109.205 | 393.439 | 424.771 | 417.659 |
| A_23_P358944   | PML          | promyelocytic leukemia                                                          | 2604.73 | 2712.39 | 1700.97 | 8365.79 | 6572.95 | 8753.6  |
| A_23_P218369   | CCL14        | C-C motif chemokine ligand 14                                                   | 6.39778 | 11.5824 | 8.49833 | 21.4948 | 32.5795 | 35.1819 |
| A_23_P63402    | GPSM2        | G protein signaling modulator 2                                                 | 289.604 | 331.809 | 280.474 | 886.924 | 805.596 | 1458.04 |
| A_32_P64200    | GUCA1B       | guanylate cyclase activator 1B                                                  | 13.154  | 13.2608 | 20.2333 | 47.4716 | 62.7609 | 44.7884 |
| A_21_P0003279  | Inc-WNT7A-1  |                                                                                 | 13.0816 | 13.5203 | 12.2753 | 40.7415 | 54.6687 | 36.4202 |
| A_33_P3272169  | CLIP2        | CAP-Gly domain containing linker protein 2                                      | 45.9161 | 49.8941 | 30.959  | 128.605 | 146.872 | 139.439 |
| A_33_P3375681  | LOC100129027 | uncharacterized LOC100129027                                                    | 10.6242 | 12.05   | 13.735  | 27.5101 | 45.1047 | 52.42   |
| A_21_P0004584  |              |                                                                                 | 7.27909 | 9.30388 | 9.6325  | 20.9314 | 31.162  | 36.939  |
| A_21_P0013515  |              |                                                                                 | 8.9176  | 7.31642 | 3.45849 | 23.3494 | 19.2498 | 18.5387 |
| A_33_P3419945  |              |                                                                                 | 68.8838 | 54.1495 | 143.289 | 250.772 | 295.508 | 265.726 |
| A_33_P3361457  | IFNAR2       | interferon alpha and beta receptor subunit 2                                    | 214.948 | 243.617 | 141.069 | 421.235 | 883.324 | 726.655 |
| A_33_P3361417  | C6orf57      | succinate dehydrogenase complex assembly factor 4                               | 367.327 | 245.181 | 385.054 | 797.121 | 1213.93 | 1302.04 |
| A_24_P3353905  | MXRA8        | matrix-remodelling associated 8                                                 | 21.6127 | 22.9638 | 15.549  | 39.1356 | 80.5665 | 88.2823 |
| A_19_P00320407 | LOC100506047 | long intergenic non-protein coding RNA 2580                                     | 33.6616 | 16.8555 | 20.9733 | 76.8442 | 79.6537 | 67.9565 |
| A_33_P3408203  | TGFA         | transforming growth factor alpha                                                | 429.2   | 269.85  | 287.577 | 861.835 | 859.241 | 1570.65 |
| A_33_P3277097  | LY6G6E       | lymphocyte antigen 6 family member G6E                                          | 40.9885 | 64.7387 | 64.2799 | 114.151 | 241.138 | 212.652 |
| A_23_P85543    | RNF2         | ring finger protein 2                                                           | 227.523 | 181.695 | 180.324 | 564.442 | 668.087 | 673.953 |
| A_21_P0004143  | LINC01335    | long intergenic non-protein coding RNA 1335                                     | 11.7822 | 10.5663 | 9.40896 | 22.3236 | 38.2847 | 45.8807 |
| A_33_P3258013  | UBE3B        | ubiquitin protein ligase E3B                                                    | 1294.08 | 2013.42 | 1054.12 | 4326.44 | 4369.98 | 4813.02 |
| A_33_P3683076  | MAGED2       | MAGE family member D2                                                           | 87.2568 | 72.9595 | 108.267 | 277.362 | 193.458 | 424.857 |
| A_33_P3254634  | PDIA5        | protein disulfide isomerase family A member 5                                   | 170.333 | 145.969 | 81.7226 | 299.456 | 481.107 | 462.237 |
| A_19_P00802154 | DST          | dystonin                                                                        | 38.7924 | 27.4723 | 43.2032 | 72.7368 | 133.078 | 153.767 |
| A_24_P323545   | MYH14        | myosin heavy chain 14                                                           | 48.1336 | 27.4444 | 40.6883 | 98.9445 | 146.255 | 120.006 |
| A_33_P3415345  | ALS2         | alsin Rho guanine nucleotide exchange factor ALS2                               | 39.9043 | 42.4445 | 33.3243 | 88.096  | 135.493 | 151.529 |
| A_32_P59811    |              |                                                                                 | 49.5549 | 44.4937 | 57.5504 | 101.996 | 228.55  | 171.206 |
| A_23_P62115    | TIMP1        | TIMP metalloproteinase inhibitor 1                                              | 1613.09 | 1309.43 | 2156.93 | 3709.94 | 6778.51 | 5688.59 |
| A_33_P3436316  | ASXL1        | ASXL transcriptional regulator 1                                                | 531.099 | 429.2   | 432.28  | 974.543 | 1458.36 | 2176.87 |
| A_33_P3343155  | GNAQ         | G protein subunit alpha q                                                       | 132.394 | 138.926 | 208.369 | 392.761 | 628.684 | 487.305 |
| A_21_P0007140  | Inc-PGAP2-1  | Inc-PGAP2-1                                                                     | 10.715  | 9.90767 | 6.68984 | 25.7737 | 23.8115 | 35.9247 |
| A_21_P0006228  | Inc-STXBP1-1 | Inc-STXBP1-1                                                                    | 18.679  | 23.4004 | 12.2363 | 52.6769 | 46.4955 | 67.1685 |
| A_21_P0013062  | LOC101928106 | long intergenic non-protein coding RNA 2522                                     | 20.9705 | 15.6093 | 11.8664 | 41.2674 | 56.7484 | 50.9886 |
| A_21_P0005973  | LOC101927459 | long intergenic non-protein coding RNA 1608                                     | 4.63669 | 4.83441 | 5.91645 | 15.9108 | 17.4169 | 14.6376 |
| A_32_P178945   | YOD1         | YOD1 deubiquitinase                                                             | 410.071 | 516.6   | 696.774 | 1238.54 | 2160.02 | 1681.19 |
| A_23_P207774   | KSR1         | kinase suppressor of ras 1                                                      | 17.0096 | 17.4514 | 12.0256 | 33.4779 | 59.324  | 54.3384 |
| A_33_P3417487  | SCUBE1       | signal peptide, CUB domain and EGF like domain containing 1                     | 22.1923 | 31.7534 | 27.4723 | 62.1711 | 91.5055 | 101.889 |
| A_33_P3325914  | TAPBP        | TAP binding protein                                                             | 481.613 | 597.621 | 324.402 | 1385.97 | 1250.34 | 1570.05 |
| A_33_P3227258  |              |                                                                                 | 13.1743 | 14.4886 | 17.8147 | 36.6654 | 52.216  | 51.4876 |
| A_23_P201122   | ZC3HAV1      | zinc finger CCCH-type containing, antiviral 1                                   | 39.4199 | 63.782  | 39.7839 | 162.443 | 129.207 | 138.134 |
| A_33_P3394213  | GRIN3B       | glutamate ionotropic receptor NMDA type subunit 3B                              | 4.60536 | 3.49631 | 3.54901 | 17.6245 | 9.19366 | 9.99407 |
| A_23_P405873   | C9orf72      | C9orf72-SMCR8 complex subunit                                                   | 23.2426 | 24.7922 | 24.4952 | 49.2444 | 94.5619 | 83.9441 |
| A_33_P3264780  | CDK8         | cyclin dependent kinase 8                                                       | 60.9304 | 83.7078 | 52.1711 | 145.783 | 281.668 | 175.917 |
| A_33_P3258265  | SEMA6C       | sema domain, transmembrane domain (TM), and cytoplasmic domain, (semaphorin) 6C | 38.0255 | 47.1601 | 27.3728 | 80.881  | 136.385 | 120.743 |

|                |              |                                                    |         |         |         |         |         |         |
|----------------|--------------|----------------------------------------------------|---------|---------|---------|---------|---------|---------|
| A_23_P46604    | NIPAL3       | NIPA like domain containing 3 [Homo sapiens]       | 265.094 | 209.474 | 199.177 | 795.626 | 433.994 | 858.105 |
| A_21_P0001246  | LOC101927851 | uncharacterized LOC101927851                       | 157.342 | 156.071 | 298.619 | 545.446 | 564.442 | 629.235 |
| A_23_P502832   | RBM12        | RNA binding motif protein 12                       | 185.098 | 142.067 | 170.283 | 375.628 | 589.941 | 526.327 |
| A_33_P3286302  | TNFRSF14     | TNF receptor superfamily member 14                 | 79.2912 | 94.8105 | 100.582 | 317.25  | 261.52  | 235.988 |
| A_33_P3225418  | HCG9         | HLA complex group 9                                | 5.97476 | 8.60193 | 9.68659 | 18.8909 | 32.1029 | 21.0817 |
| A_33_P3349414  | ZBTB43       | zinc finger and BTB domain containing 43           | 823.691 | 900.093 | 1184.06 | 1996.61 | 3123.17 | 3608.69 |
| A_24_P50801    | NRP2         | neuropilin 2                                       | 14.8544 | 26.6982 | 16.761  | 51.2619 | 50.0146 | 66.3879 |
| A_23_P41365    | SMR3A        | submaxillary gland androgen regulated protein 3A   | 25.6104 | 35.5265 | 36.1578 | 72.7809 | 100.118 | 114.781 |
| A_23_P147109   | TOR4A        | torsin family 4 member A                           | 397.941 | 459.966 | 241.091 | 929.351 | 1184.62 | 1016.69 |
| A_33_P3325395  |              |                                                    | 14.5631 | 15.3395 | 10.6098 | 31.2329 | 44.2101 | 43.3631 |
| A_21_P0000613  | TFAP2A-AS1   | TFAP2A antisense RNA 1                             | 52.0264 | 55.4702 | 58.4044 | 165.393 | 114.389 | 224.072 |
| A_33_P3219860  | OPA1-AS1     | OPA1 antisense RNA 1                               | 17.2708 | 11.8685 | 11.9434 | 39.9488 | 42.8312 | 35.6888 |
| A_19_P00803333 | ZSWIM6       | zinc finger SWIM-type containing 6                 | 110.832 | 110.808 | 80.5337 | 203.771 | 336.533 | 348.675 |
| A_23_P127663   | PRRG4        | proline rich and Gla domain 4                      | 116.766 | 90.8016 | 104.356 | 407.728 | 232.561 | 280.474 |
| A_24_P278172   | ZFAND5       | zinc finger AN1-type containing 5                  | 397.195 | 334.779 | 531.492 | 1037.23 | 1250.84 | 1303.85 |
| A_23_P163143   | ACYP1        | acylphosphatase 1                                  | 1231.73 | 1159.76 | 1380.71 | 2897.14 | 4709.47 | 3432.34 |
| A_21_P0004859  | BTN2A1       | butyrophilin subfamily 2 member A1                 | 54.3384 | 52.5018 | 50.7737 | 111.763 | 206.682 | 148.685 |
| A_23_P58293    | UBE2D3       | ubiquitin conjugating enzyme E2 D3                 | 1879.48 | 1766.25 | 1299.05 | 4910.44 | 3772.79 | 5492.55 |
| A_33_P3243394  | SLMAP        | sarcolemma associated protein                      | 21.0279 | 16.2381 | 17.7263 | 39.6649 | 61.4775 | 58.5429 |
| A_21_P0014778  | LOC100507516 | uncharacterized LOC100507516                       | 11.7708 | 10.066  | 11.6645 | 29.6388 | 23.7313 | 46.2545 |
| A_33_P3371954  | IGSF8        | immunoglobulin superfamily member 8                | 126.704 | 110.832 | 145.45  | 276.222 | 468.476 | 368.243 |
| A_24_P192988   | CCDC89       | coiled-coil domain containing 89                   | 8.67266 | 9.0244  | 10.1883 | 21.2587 | 27.8482 | 31.1768 |
| A_23_P79331    | TMBIM1       | transmembrane BAX inhibitor motif containing 1     | 1609.26 | 2570.89 | 1666.76 | 5719.67 | 6683.25 | 4171.9  |
| A_32_P50123    | SRGAP2B      | SLIT-ROBO Rho GTPase activating protein 2B         | 52.7193 | 61.8848 | 50.0707 | 149.701 | 169.292 | 146.698 |
| A_19_P00315967 |              |                                                    | 45.9098 | 34.5705 | 56.4578 | 139.36  | 111.763 | 128.046 |
| A_32_P440768   | ALOX12P2     | ALOX12P2 arachidonate 12-lipoxygenase pseudogene 2 | 90.1062 | 107.89  | 91.3898 | 257.422 | 307.834 | 247.943 |
| A_33_P3238425  | SLC2A7       | solute carrier family 2 member 7                   | 13.4941 | 7.49568 | 7.76082 | 24.5112 | 27.233  | 25.9634 |
| A_33_P3415748  | LOC100129072 | uncharacterized LOC100129072                       | 11.9263 | 18.7989 | 12.1822 | 31.8472 | 41.2347 | 45.7842 |
| A_23_P137046   | NYX          | nyctalopin                                         | 276.894 | 280.368 | 379.116 | 724.795 | 1119.48 | 792.028 |
| A_23_P147826   | RAP2C        | RAP2C, member of RAS oncogene family               | 100.224 | 88.626  | 62.4414 | 179.46  | 270.741 | 248.781 |
| A_19_P00322673 |              |                                                    | 12.0469 | 13.3247 | 12.7516 | 27.4802 | 34.2986 | 46.5189 |
| A_21_P0004860  | BTN2A1       | butyrophilin subfamily 2 member A1                 | 110.658 | 109.037 | 109.115 | 230.928 | 395.044 | 307.194 |
| A_33_P3370364  | PRLHR        | prolactin releasing hormone receptor               | 177.405 | 215.206 | 193.687 | 716.506 | 435.418 | 501.943 |
| A_33_P3308101  |              |                                                    | 152.2   | 174.859 | 190.663 | 366.165 | 515.735 | 568.48  |
| A_32_P102062   | FOXO3        | forkhead box O3                                    | 156.071 | 141.069 | 158.84  | 347.451 | 586.797 | 361.879 |
| A_33_P3400292  |              |                                                    | 11.6363 | 12.3037 | 13.2928 | 27.4238 | 45.2471 | 32.2121 |
| A_23_P34942    | EVI5         | ecotropic viral integration site 5                 | 24.9787 | 17.5996 | 17.9817 | 52.5643 | 56.6441 | 55.2859 |
| A_33_P3265376  | HOMER3       | homer scaffold protein 3                           | 255.297 | 171.206 | 226.248 | 571.986 | 710.277 | 501.14  |
| A_23_P310350   | SHPK         | sedoheptulokinase                                  | 295.508 | 368.461 | 283.812 | 639.116 | 1028.62 | 956.836 |
| A_33_P3295917  | IL7          | interleukin 7                                      | 7.50421 | 7.19988 | 8.06244 | 20.7573 | 20.9475 | 20.3343 |
| A_33_P3238074  | MIEF1        | mitochondrial elongation factor 1                  | 17149.3 | 17664.2 | 19018.7 | 47544.9 | 44705.3 | 54132.9 |
| A_21_P0000126  | TGFBR3L      | transforming growth factor beta receptor 3 like    | 155.208 | 171.799 | 149.604 | 400.836 | 515.318 | 367.864 |
| A_23_P137423   | IGSF8        | immunoglobulin superfamily member 8                | 261.82  | 227.204 | 311.741 | 599.126 | 840.832 | 698.432 |
| A_33_P3246885  | DMKN         | dermokine                                          | 1413.14 | 1288.35 | 1318.96 | 2668.02 | 4257.56 | 3906.8  |
| A_33_P3317211  | MECP2        | methyl-CpG binding protein 2                       | 50.8164 | 43.2396 | 51.8197 | 97.1282 | 139.524 | 154.543 |
| A_23_P259413   | CDV3         | CDV3 homolog                                       | 3033.1  | 1909.75 | 2283.27 | 5731.92 | 6136.83 | 6752.79 |
| A_23_P132226   | TPST2        | tyrosylprotein sulfotransferase 2                  | 605.852 | 744.419 | 852.049 | 1630.11 | 2151.2  | 1908.94 |
| A_33_P3279984  |              |                                                    | 6.49108 | 9.95195 | 7.90781 | 19.4208 | 21.8728 | 20.4002 |
| A_33_P3232038  | RBAK-RBAKDN  | RBAK-RBAKDN readthrough                            | 261.605 | 267.078 | 265.226 | 551.36  | 772.788 | 728.678 |
| A_21_P0007042  | LOC101927946 | uncharacterized LOC101927946                       | 8.37467 | 8.1286  | 8.82206 | 16.9186 | 24.4751 | 24.2573 |
| A_24_P99216    | LRP10        | LDL receptor related protein 10                    | 599.126 | 524.335 | 680.232 | 1584.9  | 1431.75 | 1555.44 |
